# Supplementary material for: An aggressive systemic mastocytosis preceded by ovarian dysgerminoma
Source: PubMed Central journal article supplement (PMC7693501; doi:10.1186/s12885-020-07653-z), 2020-11-27
Supplement: 12885_2020_7653_MOESM4_ESM.pdf [file 12885_2020_7653_MOESM4_ESM.pdf]

*TET2* exon 11 V1846F  
Gtc>Ttc

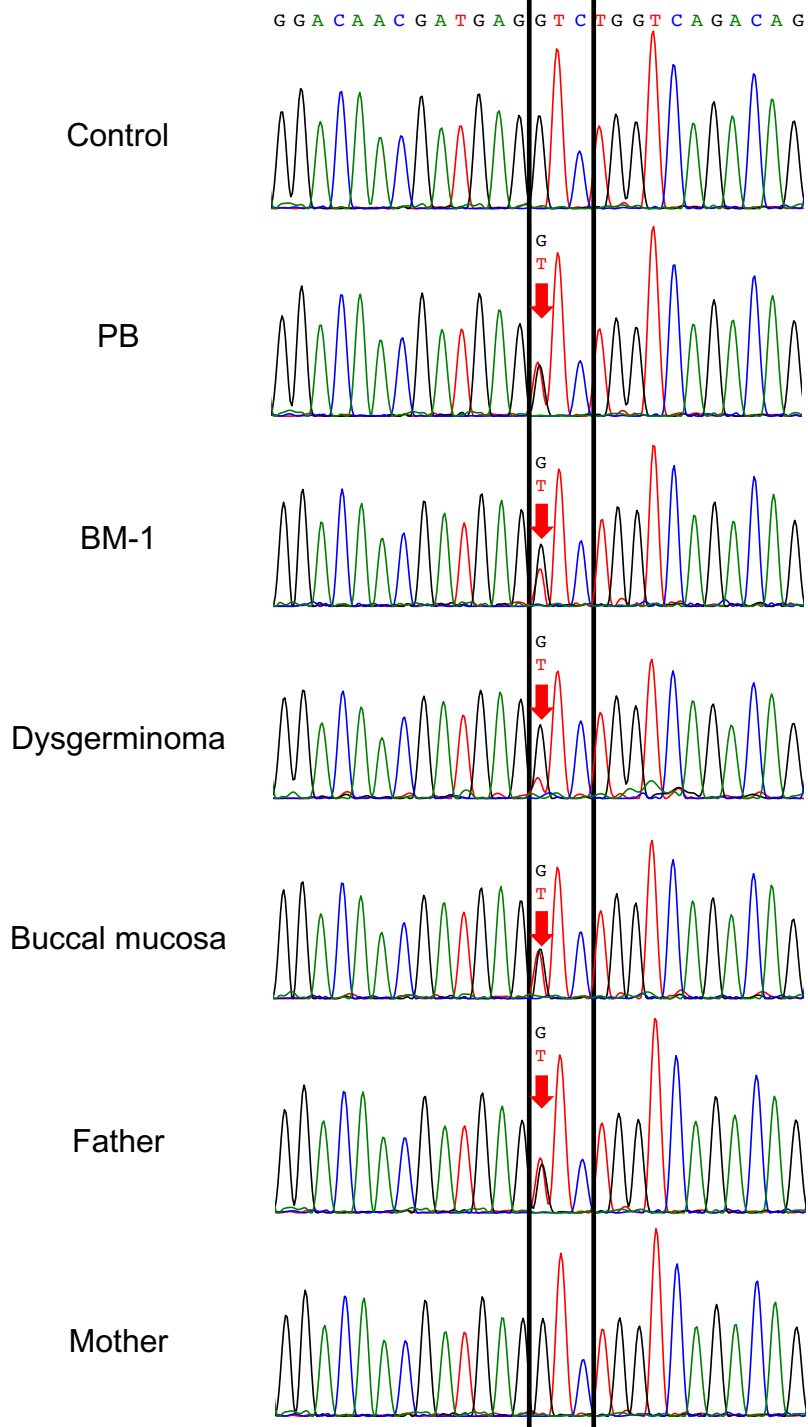

Fig. S3
